# Supplementary material for: Magnetic and transport properties of Te doped Yb14MnSb11
Source: Royal Society of Chemistry journal article supplement (doi:10.1039/c2jm32089d), 2012-01-01
Supplement: c2jm32089d.pdf [file c2jm32089d.pdf]

## Magnetic and transport properties of Te doped Yb<sub>14</sub>MnSb<sub>11</sub>

Tanghong Yi,<sup>1</sup> M. N. Abdusalyamova,<sup>2</sup> F. Makhmudov,<sup>2</sup> Susan M. Kauzlarich<sup>1,\*</sup>

<sup>1</sup>Department of Chemistry, University of California, One Shields Ave, Davis, CA 95616

<sup>2</sup>Institute of Chemistry Tajik Acad. Sci, 299/2 Ajni St., 734063 Dushanbe, Tajikistan

### Supporting Information

**Table 1(SI)** Temperature dependent thermal diffusivity, Dulong-Petit heat capacity and geometric density of the pellets of Yb<sub>14</sub>MnSb<sub>11-x</sub>Te<sub>x</sub> (x = 0, 0.07(5), 0.16(8), 0.19(7)).

| Temperature (K)             | Thermal Diffusivity (cm <sup>2</sup> /s) | Temperature (K)             | Thermal Diffusivity (cm <sup>2</sup> /s) | Temperature (K)             | Thermal Diffusivity (cm <sup>2</sup> /s) | Temperature (K)             | Thermal Diffusivity (cm <sup>2</sup> /s) |
|-----------------------------|------------------------------------------|-----------------------------|------------------------------------------|-----------------------------|------------------------------------------|-----------------------------|------------------------------------------|
| Te = 0                      |                                          | Te = 0.07                   |                                          | Te = 0.16                   |                                          | Te = 0.19                   |                                          |
| C <sub>p</sub> = 0.17 J/gK  |                                          | C <sub>p</sub> = 0.17 J/gK  |                                          | C <sub>p</sub> = 0.17 J/gK  |                                          | C <sub>p</sub> = 0.17 J/gK  |                                          |
| d = 8.368 g/cm <sup>3</sup> |                                          | d = 8.203 g/cm <sup>3</sup> |                                          | d = 8.162 g/cm <sup>3</sup> |                                          | d = 8.252 g/cm <sup>3</sup> |                                          |
| 361.5                       | 0.00578                                  | 295.5                       | 0.00647                                  | 297.0                       | 0.00696                                  | 297.7                       | 0.00703                                  |
| 461.3                       | 0.00606                                  | 389.5                       | 0.00656                                  | 388.3                       | 0.00704                                  | 387.3                       | 0.00713                                  |
| 561.6                       | 0.00602                                  | 483.4                       | 0.00642                                  | 483.8                       | 0.00679                                  | 484.3                       | 0.00696                                  |
| 659.4                       | 0.00584                                  | 577.9                       | 0.00633                                  | 579.6                       | 0.00664                                  | 579.7                       | 0.00678                                  |
| 755.9                       | 0.00562                                  | 673.2                       | 0.00613                                  | 674.2                       | 0.00649                                  | 674.7                       | 0.00643                                  |
| 708.4                       | 0.00571                                  | 772.3                       | 0.00591                                  | 772.8                       | 0.00614                                  | 773.5                       | 0.00608                                  |
| 852.6                       | 0.00532                                  | 873.3                       | 0.00568                                  | 873.1                       | 0.00586                                  | 873.7                       | 0.00589                                  |
| 951.8                       | 0.00513                                  | 972.3                       | 0.00551                                  | 971.6                       | 0.00565                                  | 972.1                       | 0.00558                                  |
| 1046.7                      | 0.00508                                  | 1073.5                      | 0.00547                                  | 1072.5                      | 0.00553                                  | 1073                        | 0.00548                                  |
| 1140.0                      | 0.00492                                  | 1171.8                      | 0.00544                                  | 1170.7                      | 0.00561                                  | 1171.5                      | 0.00542                                  |
| 1235.0                      | 0.00513                                  | 1272.7                      | 0.00568                                  | 1271.3                      | 0.00582                                  | 1272.5                      | 0.00576                                  |
